# Supplementary material
Source: PubMed Central journal article supplement (PMC3983358)

## SUPPORTING INFORMATION

### **<sup>64</sup>Cu-Labeled of Inhibitors of Prostate Specific Membrane Antigen for PET Imaging of Prostate Cancer**

---

Sangeeta Ray Banerjee<sup>1</sup>, Mrudula Pullambhatla<sup>1</sup>, Catherine A. Foss<sup>1</sup>, Sridhar Nimmagadda<sup>1</sup>, Riccardo Ferdani<sup>2</sup>, Carolyn J. Anderson<sup>2</sup>, Ronnie C. Mease<sup>1</sup>, Martin G. Pomper<sup>1</sup>

Russell H. Morgan Department of Radiology and Radiological Sciences, Johns Hopkins Medical  
Institutions, Baltimore, MD 21231

Corresponding Author: Martin G. Pomper, M.D., Ph.D.  
Johns Hopkins Medical Institutions  
1550 Orleans Street, 492 CRB II  
Baltimore, MD 21231  
410-955-2789 (T)  
443-817-0990 (F)  
Email:mpomper@jhmi.edu

Co-corresponding Author: Sangeeta Ray Banerjee, Ph.D.  
Johns Hopkins Medical Institutions  
1550 Orleans Street, 4M07 CRB II,  
Baltimore, MD 21287  
Phone: 410-955-8697  
Fax: 410-614-3147  
Email:sray9@jhmi.edu

## TABLE OF CONTENTS

|    |                                                                            |      |
|----|----------------------------------------------------------------------------|------|
| 1  | <b>Figure S1. Structure of ZJ43</b>                                        | S3   |
| 2. | <b>Figure S2. In vivo blocking study of [<sup>64</sup>Cu]6B using ZJ43</b> | S3   |
| 3. | <b>Spectral and HPLC data</b>                                              | S4-6 |

**Figure S1. Structure of ZJ43**

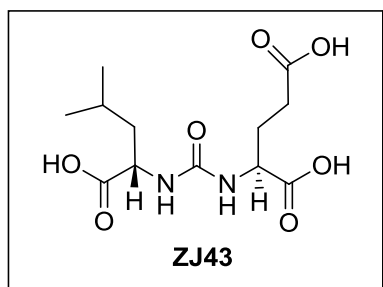

**Figure S2.**

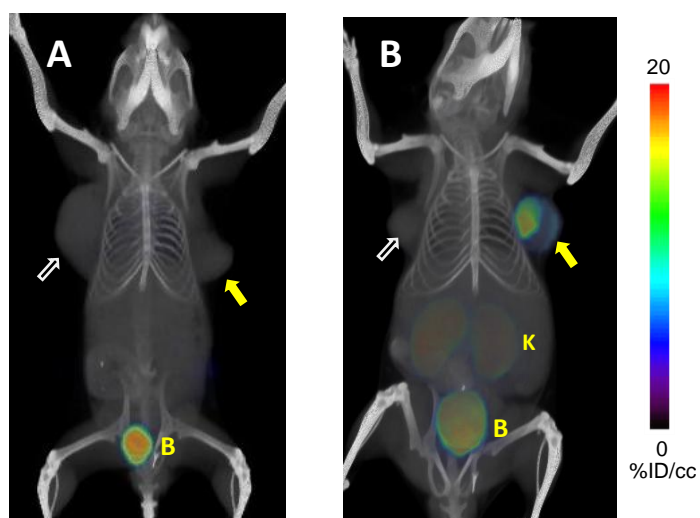

**Figure S2.** PET-CT images of PSMA+ PIP and PSMA- flu tumor-bearing male SCID mice using ~200  $\mu\text{Ci}$  of [ $^{64}\text{Cu}$ ]6B per mouse. Images obtained with (left, A) and without (right, B) blockade of PSMA using the potent, selective PSMA inhibitor, ZJ43, as the blocking agent (50 mg/kg). Reduction of radiopharmaceutical uptake in both the tumor and kidneys (another PSMA+ site) upon co-treatment with ZJ43 provides a further check on PSMA-specific binding. Images were acquired after 30 min post injection. All images are normalized.

**Figure S3.** Preparative HPLC chromatograms for [ $^{64}\text{Cu}$ ]3; radio-HPLC peak (top) and uv peak at 34 min is for unchelated 3 at  $\lambda = 220$  nm (bottom).

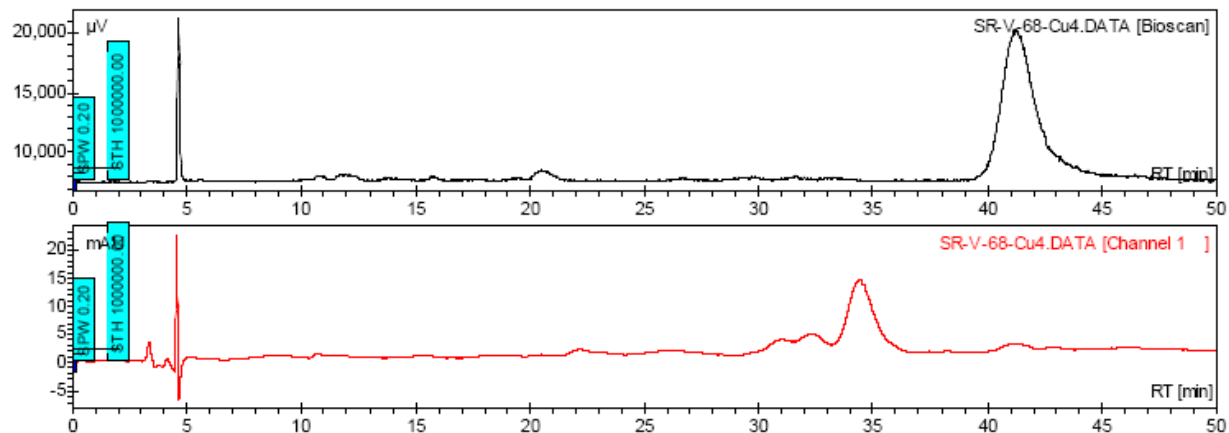

**Figure S4.** Preparative HPLC chromatograms for [ $^{64}\text{Cu}$ ]4; radio-HPLC peak (top) and uv peak at 15 min for unchelated 4;  $\lambda = 220$  nm (bottom), expanded to show purity of the radiolabeled product.

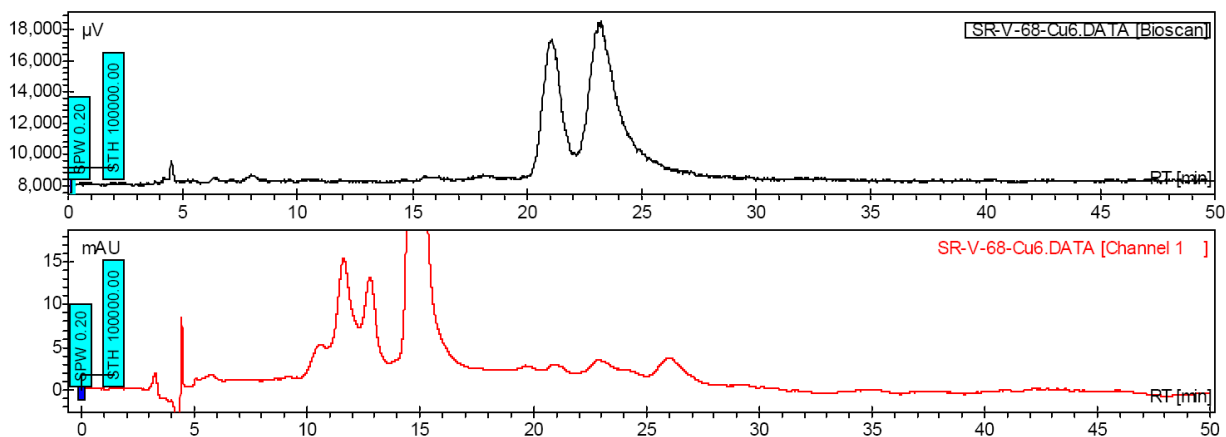

**Figure S5.** Preparative HPLC chromatograms for [<sup>64</sup>Cu]**5**; radio-HPLC peak (top) and uv peak at 10 min for unchelated **5**, λ = 220 nM (bottom), expanded to show purity of the radiolabeled product.

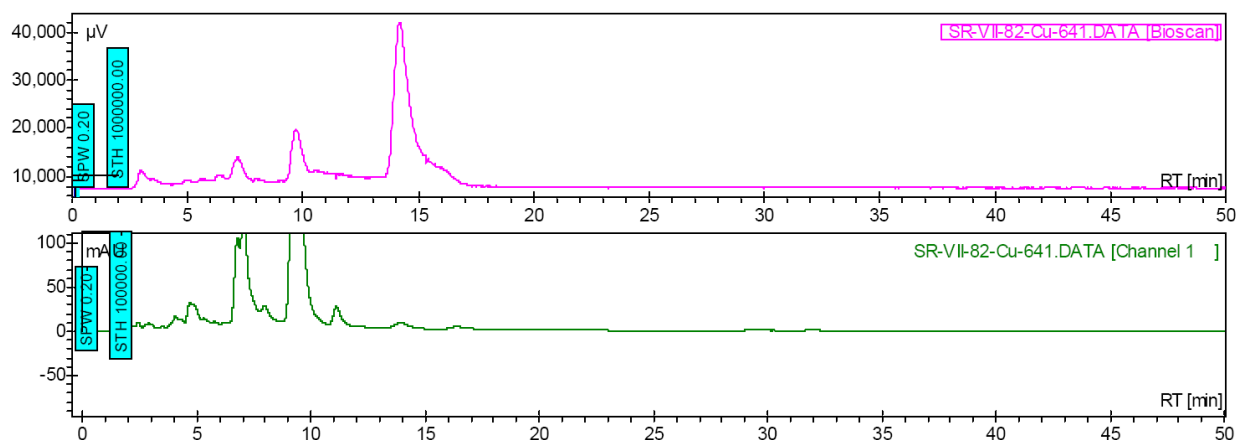

**Figure S6.** Preparative HPLC chromatograms for [<sup>64</sup>Cu]**6**; radio-HPLC peak (top) and uv peak at 18-21 min for unchelated **6**, λ = 220 nM (bottom).

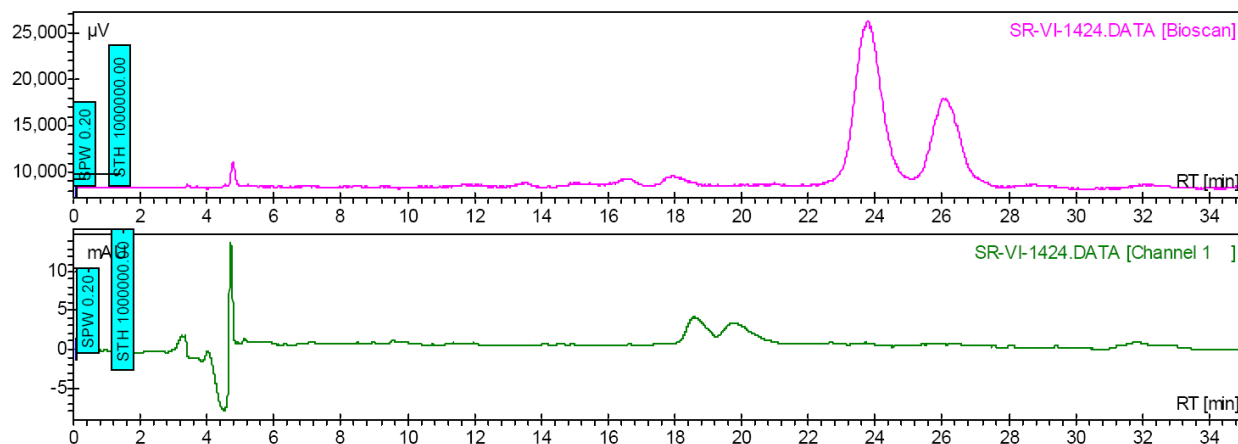

**Figure S6.** Preparative HPLC chromatograms for [<sup>64</sup>Cu]7; radio-HPLC peak (top) and uv peak at 10.4 min for unchelated 7, λ = 220 nM (bottom).

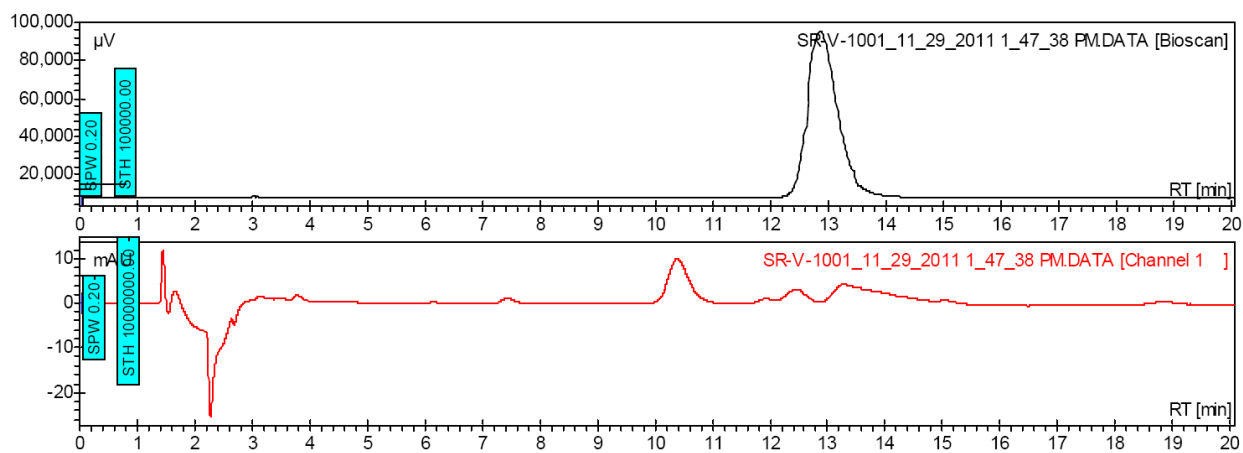

Supplement: jm401921j_si_001.pdf [file jm401921j_si_001.pdf]
